# Supplementary material for: Ground-based lidar processing and simulator framework for comparing models and observations (ALCF 1.0)
Source: Copernicus journal article supplement (doi:10.5194/gmd-14-43-2021), 2021-01-06
Supplement: Supplementary file 1 [file gmd-14-43-2021-supplement.zip]

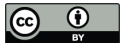

## *Supplement of*

# **Ground-based lidar processing and simulator framework for comparing models and observations (ALCF 1.0)**

**Peter Kuma et al.**

*Correspondence to:* Peter Kuma ([peter@peterkuma.net](mailto:peter@peterkuma.net))

- [gmd-14-43-2021-supplement-title-page.pdf](#)
- [alcf-1.0.0](#)
  - .editorconfig
  - .gitignore
  - LICENSE.md
  - Makefile
  - README.md
  - alcf
    - \* \_\_init\_\_.py
    - \* algorithms
    - \* cmds
    - \* lidars
    - \* misc.py
    - \* models
    - \* opt
  - bin
    - \* alcf
    - \* cosp\_alcf
  - build\_dep
  - cmor\_patch.diff
  - cosp\_patch.diff
  - download\_dep
  - mie\_scattering
    - \* README.md
    - \* bin

- \* miev
  - \* out
  - \* plot
- setup.py
- src
  - \* cosp\_run.f03
  - \* main.f03
  - \* nc\_utils.f03
- watch

The copyright of individual parts of the supplement might differ from the CC BY 4.0 License.
