# Supplementary material for: Ground-based lidar processing and simulator framework for comparing models and observations (ALCF 1.0)
Source: Copernicus journal article supplement (doi:10.5194/gmd-14-43-2021), 2021-01-06
Supplement: Supplementary file 1 [file MIEV.doc]

               M I E V    D O C U M E N T A T I O N
               ------------------------------------

** NOTE **  The output variable SPIKE, having to do with the detection
of resonances, is still under research and will undoubtedly change in
the future.  Presently, SPIKE only detects the broadest spikes, of width
roughly 0.1 in size parameter;  ultimately narrower spikes should also
be detected, although the probability of hitting them is much smaller.
SPIKE is mainly of use in avoiding spikes during numerical integration
over a size distribution.

Author:  Dr. Warren J. Wiscombe (wiscombe@climate.gsfc.nasa.gov)
         NASA Goddard Space Flight Center
         Code 913
         Greenbelt, MD 20771

FTP availability:  The entire package is available by anonymous ftp
   from Internet site climate.gsfc.nasa.gov in subdirectory
   pub/wiscombe.  (ftp to 'climate', login as 'anonymous', give
   your e-mail address as password, then 'cd' to pub/wiscombe.)


The MIEV package contains the following files (besides the present one):

(1) MIEV0.f, the main subroutine which a user calls, plus ancillary
    subroutines

(1a) MIEV0noP.f:  MIEV0.f with all the code relating to Legendre
     moments PMOM removed (smaller and requires less array storage);
     just created 12/89 and seems to be working fine but has not had
     the benefit of years of user testing like MIEVO.f;  argument
     list same as MIEV0.f in order to allow swapping of this with
     MIEV0.f without changing calling program(s)

(2) ErrMsg.f:  a set of 4 error-handling routines needed by both
    MIEV0.f and MIEV0noP.f

(3) MVTstOld.f, the main program for running the 8 test cases at
    the end of Reference (1) below

(4) MVTstOld.out, the output generated by MVTstOld.f

(5) MVTstNew.f, the main program for running an exhaustive set of
    19 test cases.

(6) MVTstNew.out, the output generated by MVTstNew.f

(7) PMOMTest.f, a program to test the Legendre coefficients computed
    by  *MIEV0*  against those computed approximately by numerical
    quadrature of the phase matrix

Note that MIEV1, the Cray-customized version of MIEV0 described in
Ref.(1) below, is omitted from this package.  Very few users chose to
use MIEV1 because its speed advantage over MIEV0 was only
about 20% in typical cases.  The speed advantage could grow to several
hundred percent if only cross-sections and asymmetry factor were needed,
since MIEV1 took advantage of the CRAY's ability to vectorize summing
loops.

All modules have some internal documentation in addition to what
you will find in this file.  Also, all the declaration statements
were standardized using the NAG Fortran Tools.

MIEV0 computes the following quantities involved in eletromagnetic
scattering from a homogeneous sphere:

  * scattering and extinction efficiencies;
  * asymmetry factor;
  * forward- and backscatter amplitude;
  * scattering amplitudes vs. scattering angle for incident
      polarization parallel and perpendicular to the plane
      of scattering;
  * coefficients in the Legendre polynomial expansions of
      either the unpolarized phase function or the polarized
      phase matrix;
  * some quantities needed in polarized radiative transfer;
  * information about whether or not a resonance has been hit.

NOTE -- MIEV0 differs from the original code published
        in Ref. (1) below in the following ways :

     * computes Legendre moments, based on vast
       improvements to the formulas of Sekera (see Refs. 3-5)
       and correction of errors in the formulas of Ref. 3

     * returns a measure of how nasty of a spike (resonance) you
       are sitting on ( this is invaluable when integrating over
       size and you want to exclude unrepresentative points);  
       this part of the program is a work-in-progress and
       is far from finished, but it may prove useful even
       in its present form

     * allows real refractive indices less than unity

     * adds a totally reflecting special case

     * performs a self-test on the first call to the routine

     * adds several new input and output variables, and makes
       all I/O through arguments of the subroutine

     * allows complete freedom in specifying angles

     * allows printing of all output variables at user option

     * some variables names are more mnemonic

   Also, major improvements have been made, based on
   modern ideas of documentation and program structure (e.g.,
   Kernighan and Plauger, The Elements of Programming Style).  
   Those interested in my thoughts in this area may find
   PostScript documents in the anonymous ftp directory cited
   above, under pub/wiscombe/Writing_Programs.


 REFERENCES
 ----------

   (1) Wiscombe, W., 1979: Mie Scattering Calculations--Advances
          in Technique And Fast, Vector-Speed Computer Codes,
          Ncar Tech Note Tn-140+Str, National Center For
          Atmospheric Research, Boulder, Colorado (NCAR no
          longer distributes this, so contact the author or
          NTIS for a copy)

   (2) Wiscombe, W., 1980: Improved Mie Scattering Algorithms,
          Appl. Opt. 19, 1505-1509

   (3) Dave, J.V., 1970a:  Coefficients of the Legendre and
          Fourier Series for the Scattering Functions of
          Spherical Particles, Appl. Opt. 9, 1888-1896

   (4) Dave, J.V., 1970b:  Intensity and Polarization of the
          Radiation Emerging from a Plane-Parallel Atmosphere
          Containing Monodisperse Aerosols, Appl. Opt. 9, 2673-84

   (5) Van De Hulst, 1957, 1982:  Light Scattering by Small
          Particles, Dover Press, New York.

   (6) Bohren, C. and D. Huffman, Absorption and Scattering of
          Light by Small Particles, Wiley, New York.  (has a
          Mie program in the back of the book)


   I N P U T   V A R I A B L E S
   -----------------------------

  ( Even if an input variable is not needed for a particular
    application, make sure it has a legitimate value that can
    be written out and read in -- no indefinites, etc. )

  XX        Mie size parameter ( 2 * pi * radius / wavelength )

  CREFIN    Complex refractive index ( imag part can be + or -,
            but internally a negative imaginary index is assumed ).
            If imag part is - ,  scattering amplitudes as in Van
            de Hulst are returned;  if imag part is + , complex
            conjugates of those scattering amplitudes are returned
            (the latter is the convention in physics).
            ** NOTE ** In the 'PERFECT' case, scattering amplitudes
            in the Van de Hulst (Ref. 6 above) convention will
            automatically be returned unless  Im(CREFIN)  is
            positive;  otherwise, CREFIN plays no role.

  PERFCT    TRUE, assume refractive index is infinite and use
            special case formulas for Mie coefficients  'a'
            and  'b'  ( see Kerker, M., The Scattering of
            Light and Other Electromagnetic Radiation, p. 90 ).
            This is sometimes called the 'totally reflecting',
            sometimes the 'perfectly conducting' case.
            ( see CREFIN for additional information )

  MIMCUT    (positive) value below which imaginary refractive
            index is regarded as zero ( computation proceeds
            faster for zero imaginary index )

  ANYANG    TRUE, any angles whatsoever may be input through
            XMU.  FALSE, the angles are monotone increasing
            and mirror symmetric about 90 degrees (this option
            is advantageous because the scattering amplitudes
            S1,S2 for the angles between 90 and 180 degrees
            are evaluable from symmetry relations, and hence
            are obtained with little added computational cost.)

  NUMANG    No. of angles at which scattering amplitudes
            S1,S2 are to be evaluated  ( set = 0 to skip
            calculation of S1,S2 ).  Make sure NUMANG does
            not exceed the parameter MAXANG in the program.

  XMU(N)    Cosines of angles ( N = 1 TO NUMANG ) at which S1,S2
            are to be evaluated.  If ANYANG = FALSE, then

             (a) the angles must be monotone increasing and
                 mirror symmetric about 90 degrees (if 90-A is
                 an angle, then 90+A must be also)

             (b) if NUMANG is odd, 90 degrees must be among
                 the angles

  NMOM       Highest Legendre moment PMOM to calculate,
             numbering from zero ( NMOM = 0 prevents
             calculation of PMOM )

  IPOLZN     POSITIVE, Compute Legendre moments PMOM for the
                       Mueller matrix elements determined by the
                       digits of IPOLZN, with 1 referring to M1,
                       2 to M2, 3 to S21, and 4 to D21 (Ref. 3).
                       E.g., if IPOLZN = 14 then only moments for
                       M1 and D21 will be returned.

             0,        Compute Legendre moments PMOM for the
                       unpolarized unnormalized phase function.

             NEGATIVE, Compute Legendre moments PMOM for the
                       Sekera phase quantities determined by the
                       digits of ABS(IPOLZN), with 1 referring to
                       R1, 2 to R2, 3 to R3, and 4 to R4 (REF. 4).
                       E.g., if IPOLZN = -14 then only moments for
                       R1 and R4 will be returned.

             ( NOT USED IF  NMOM = 0 )

  MOMDIM     Determines first dimension of PMOM, which is dimensioned
             internally as PMOM( 0:MOMDIM, * ) (second dimension must
             be the larger of unity and the highest digit in
             IPOLZN; if not, serious errors will occur).
             Should be set even when  NMOM = 0.  A zero value is OK.

  PRT(L)     Print flags (LOGICAL).  L = 1  prints  S1,S2, their
             squared absolute values, and degree of polarization,
             provided NUMANG is non-zero.   L = 2  prints all
             output variables other than  S1,S2.


O U T P U T   V A R I A B L E S
-------------------------------

  QEXT      (REAL) extinction efficiency factor  ( Ref. 2, Eq. 1A )

  QSCA      (REAL) scattering efficiency factor  ( Ref. 2, Eq. 1B )

  GQSC      (REAL) asymmetry factor times scattering efficiency
            ( Ref. 2, Eq. 1C )  ( allows calculation of radiation
            pressure efficiency factor  QPR = QEXT - GQSC )

  =====================================================================
  ==== NOTE --  S1, S2, SFORW, SBACK, TFORW, AND TBACK are calculated
  ====          internally for negative imaginary refractive index;
  ====          for positive imaginary index, their complex conjugates
  ====          are taken before they are returned, to correspond to
  ====          customary usage in some parts of physics ( in parti-
  ====          cular, in papers on cam approximations to Mie theory ).
  =====================================================================

  S1(N),    (COMPLEX) Mie scattering amplitudes at angles specified
  S2(N)     by XMU(N) ( N=1 to NUMANG )  ( Ref. 2, Eqs. 1d-e ).

  SFORW     (COMPLEX) forward-scattering amplitude S1 at
            0 degrees.  ( S2(0 deg) = S1(0 deg) )

  SBACK     (COMPLEX) backscattering amplitude S1 at
            180 degrees.   ( S2(180 deg) = - S1(180 deg) )

  TFORW(I)  (COMPLEX) values of

                I=1:  T1 = ( S2 - (MU)*S1 ) / ( 1 - MU**2 )
                I=2:  T2 = ( S1 - (MU)*S2 ) / ( 1 - MU**2 )

            At angle theta = 0 ( MU = COS(theta) = 1 ), where the
            expressions on the right-hand side are indeterminate.
            ( these quantities are required for doing polarized
            radiative transfer (Ref. 4, Appendix ). )

  TBACK(I)  (COMPLEX) values of  T1 (for I=1) or  T2 (for I=2) at
            angle  theta = 180 degrees ( MU = COS(theta) = - 1 ).

  SPIKE     (REAL) magnitude of the smallest denominator of
            either Mie coefficient (a-sub-n or b-sub-n),
            taken over all terms in the Mie series past
            N = size parameter XX.  Values of SPIKE below
            about 0.3 signify a ripple spike, since these
            spikes are produced by abnormally small denominators
            in the Mie coefficients (normal denominators are of
            order unity or higher).  Defaults to 1.0 when not
            on a spike.  Does not identify all resonances
            (we are still working on that).

 PMOM(M,NP) (REAL) moments  M = 0 to NMOM  of unnormalized NP-th
            phase quantity PQ  ( moments with  M .GT. 2*NTRM  are
            zero, where  NTRM = no. terms in Mie series =
            XX + 4*XX**1/3 + 1 ) :

              PQ( MU, NP ) = sum( M=0 to infinity ) ( (2M+1)
                                * PMOM( M,NP ) * P-sub-M( MU ) )

            WHERE  MU = COS( scattering angle )
                   P-sub-M = M-th Legendre polynomial

            and the definition of 'PQ' is as follows:

            IPOLZN.GT.0:  PQ(MU,1) = CABS( S1(MU) )**2
                          PQ(MU,2) = CABS( S2(MU) )**2
                          PQ(MU,3) = RE( S1(MU)*CONJG( S2(MU) ) )
                          PQ(MU,4) = - IM( S1(MU)*CONJG( S2(MU) ) )
                          ( called M1, M2, S21, D21 in literature )

            IPOLZN=0:  PQ(MU,1) = ( CABS(S1)**2 + CABS(S2)**2 ) / 2
                       ( the unnormalized phase function )

            IPOLZN.LT.0:  PQ(MU,1) = CABS( T1(MU) )**2
                          PQ(MU,2) = CABS( T2(MU) )**2
                          PQ(MU,3) = RE( T1(MU)*CONJG( T2(MU) ) )
                          PQ(MU,4) = - IM( T1(MU)*CONJG( T2(MU) ) )
                          ( called R1, R2, R3, R4 in literature )

            The sign of the 4th phase quantity is a source of
            confusion.  It flips if the complex conjugates of
            S1,S2  or  T1,T2  are used, as occurs when a
            refractive index with positive imaginary part is
            used (see discussion below).  The definition above
            is consistent with a negative imaginary part.

            See Ref. 5 for correct formulae for PMOM ( Eqs. 2-5
            of Ref. 3 contain typographical errors ).  Ref. 5 also
            contains numerous improvements to the Ref. 3 formulas.

            NOTE THAT OUR DEFINITION OF MOMENTS DIFFERS FROM REF. 3
            in that we divide out the factor (2M+1) and number the
            moments from zero instead of one.

            ** WARNING **  Make sure the second dimension of PMOM
            in the calling program is at least as large as the
            absolute value of IPOLZN.

            For small enough values of XX, or large enough values
            of M,  PMOM  will tend to underflow.  Thus, it is
            unwise to assume the values returned are non-zero and,
            for example, to divide some quantity by them.


  INTEGRATING OVER SIZES
  ----------------------

     The normalized phase function for a single size parameter is

         P(one size) = 4 / ( XX**2 * QSCA ) * ( i1 + i2 ) / 2

     where  i1 + i2 = CABS(S1)**2 + CABS(S2)**2.  But it is
     ( i1 + i2 ), not  P(one size), that must be integrated
     over sizes when a size distribution is involved.
     (Physically, this means that intensities are added,
     not probabilities. )  An a posteriori normalization
     then gives the correct size-averaged phase function.

    Similarly, it is the CROSS-SECTIONS, proportional to
    XX**2  times QEXT,QSCA,QPR, which should be integrated
    over sizes, not QEXT,QSCA,QPR themselves.

    Similar remarks apply to PMOM.   The normalized moments are
    4 / ( XX**2 * QSCA ) * PMOM,  but it is PMOM itself, not
    these normalized moments, which should be integrated over
    a size distribution.

    Unless avoided, ripple spikes can cause a systematic upward
    bias in any integration over size parameter, because these
    spikes tend to be smeared out by typical quadrature rules and
    thus over-represented in the final result.  Checking the output
    parameter SPIKE allows the user to filter out these cases.


 NOTES ON PROGRAM USE
 --------------------

 *** PMOM dimensioning:

     One user dimensioned PMOM(1,1) in his calling program and
     managed to clobber SFORW because he set MOMDIM=1 and
     internally PMOM is dimensioned PMOM( 0:MOMDIM, * ).
     Fortran seems to allow PMOM(0:0,*) so he could have
     saved himself by setting MOMDIM=0, but this is confusing
     and it is better to start your PMOM array at 0 just as
     the program does internally.

     Be sure to use the test problem drivers as templates
     when designing your calls to MIEV0 in order to avoid this
     kind of problem.

 *** ON PORTABILITY :

     This package is written entirely in ANSI standard FORTRAN 77
     and should work on any computer.

 *** ON PRECISION :

         "You should be aware that a complex program can produce
     different results on one computer than another because of
     differences in internal precision.  The difference can be
     minimized, but not necessarily eliminated, by using double-
     precision arithmetic and by using numerical methods that tend
     to retain maximum precision."
                                 (IBM Professional FORTRAN Manual)

         This package was developed on computers offering 14-digit
    single-precision computation.   On IBM-type machines with their
    7-digit single precision, parts of the computation ( like the
    upward recurrence for the Ricatti-Bessel functions ) might need
    to be done in double precision, depending on how big the Mie
    size paramter  XX  is.   See Ref. (1) for further discussion
    of this point.

        The package has only been tested for XX up to 20,000 and
    for real and imaginary part of CREFIN up to 10  ( this
    accomodates almost all imaginable applications ).  Slow
    deterioration of accuracy may be expected if the program
    is pushed beyond these limits.  ( Accuracy may degrade well
    before  XX = 20000  with IBM-type 7-digit precision. )

        Precision problems are most likely to OVERTLY afflict
    users

     (a) in the self-test subroutine TESTMI, where it may be
         necessary to lower the required agreement with tabulated
         results by changing the variable  ACCUR.  For example,
         to run on the IBM PC in single precision using 'IBM
         Professional FORTRAN', a value  ACCUR = 1.E-4  was
         necessary.

     (b) in the testing routines MVTst..., where the user's
         precision may be unsatisfactory for numerically
         'sensitive' quantities.

     The quantities most sensitive to precision are those involving
     series of positive and negative terms with much cancellation.
     The smaller the end result of summing compared to the average
     term size, the worse the problem.  The problem can occur
     in either of the scattering amplitudes (S1,S2) away from the
     forward scattering angle, esp. near a relative minimum.  When
     the real and imaginary parts of  S1  or  S2  differ by
     orders of magnitude, the smaller part is likely to be less
     accurate than the larger.

         The least accurate output quantities will be :

            **  TFORW and TBACK, because the numerical factors
                involved are on the order of  XX**3

            **  PMOM( M, 4 )  for any  M  and larger XX

            **  PMOM( M, NP )  for  M  approaching  2*XX

     The most accurate will be  QEXT, QSCA, GQSC, being sums
     of all positive terms.

         Please do not call the author about precision problems.
     They are endemic and cannot be solved as long as different
     computers do arithmetic differently.


 *** ON MEMORY REQUIREMENTS :

         The parameter MaxTrm in  MIEV0, LPCOEF  must be
     set to  10,100  in order to do the test problems with
     size parameter = 10,000.  Memory used by these routines can
     be significantly, often dramatically, reduced by lowering
     MaxTrm  to a value no bigger than  XMAX + 4*XMAX**1/3,
     where  XMAX  is the largest size parameter expected.

         If PMOM is never needed, the version MIEV0noP.f should
     be used instead of MIEV0.f.  This can substantially cut memory
     requirements.


 *** The self-test on the first call to the program is a novel
     feature intended to catch bugs which users may introduce into
     the code.  But it does not begin to test all the possible
     branches in the code.  The test programs included with
     this package should be used for thorough checkout of all
     branches.

 *** The arithmetic statement function  F3  is built into
     *MIEV0*, but not used.  It corresponds to the function
     f-sub-3  in Ref. 2, Eq. 8, and should be used instead
     of  F2  when only intensity and degree of polarization
     are required.   This can be implemented just by
     changing  F2 to F3 in a single executable statement.

 *** To avoid littering up the code with temporary variables,
     a reasonably optimizing compiler (one that recognizes
     invariant and repeated sub-expressions in DO-loops)
     has been assumed.  This may make the code look wasteful
     to those accustomed to dumb FORTRAN compilers.

 *** Equivalenced arrays have been used in one place (module
     LPCOEF).  (EQUIVALENCE is a dangerous feature of FORTRAN
     and should generally be avoided.)

 *** MIEV0 sacrifices some computational speed on vector computers
     in order to use the minimum possible amount of computer
     memory;  however, it still allows loops over scattering
     angle to vectorize;  and on vector computers which vectorize
     summing loops ( like the Cray ), the potentially
     time-consuming inner loops in the Legendre coefficient
     subroutine will also vectorize  ( these two kinds of loops
     account for the lion's share of computing time in a typical
     application ).
