# Supplementary figures and images for: Ground-based lidar processing and simulator framework for comparing models and observations (ALCF 1.0)
Source: Copernicus journal article supplement (doi:10.5194/gmd-14-43-2021), 2021-01-06

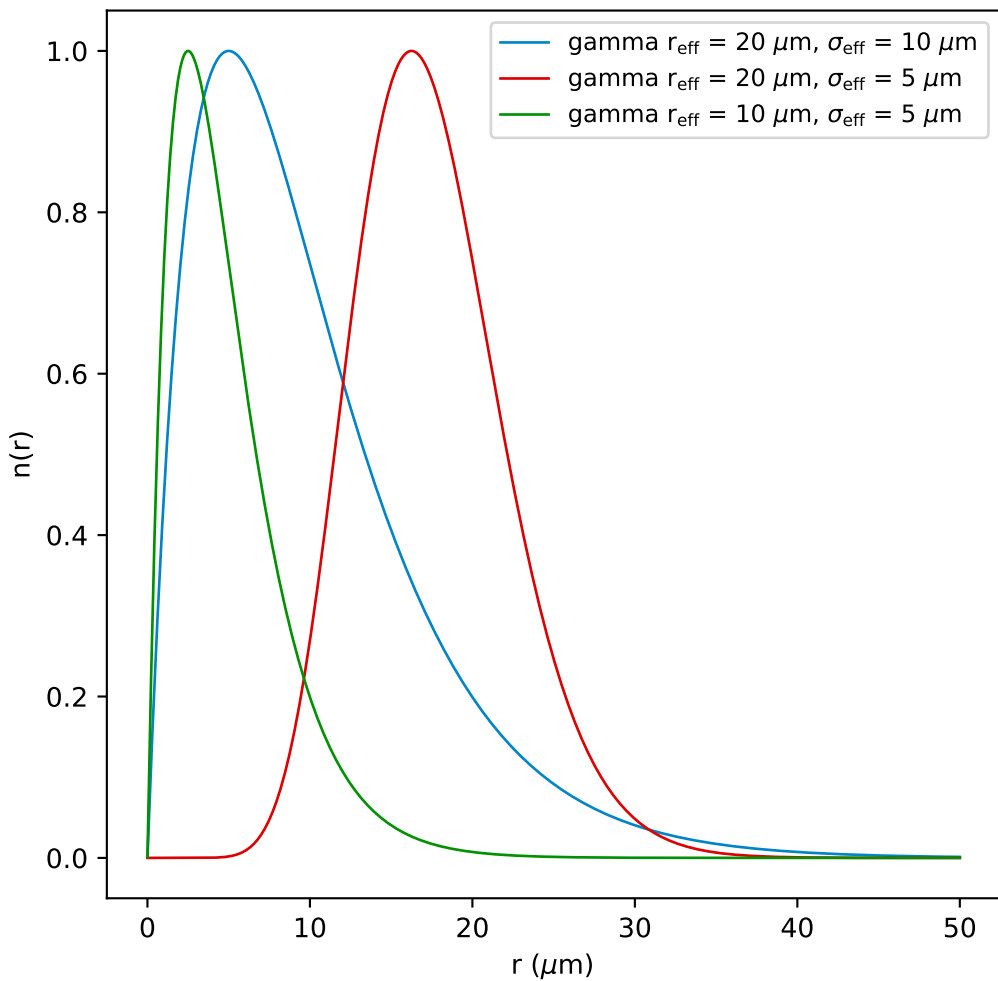

Supplement: Supplementary file 2 [file gmd-14-43-2021-supplement.zip]

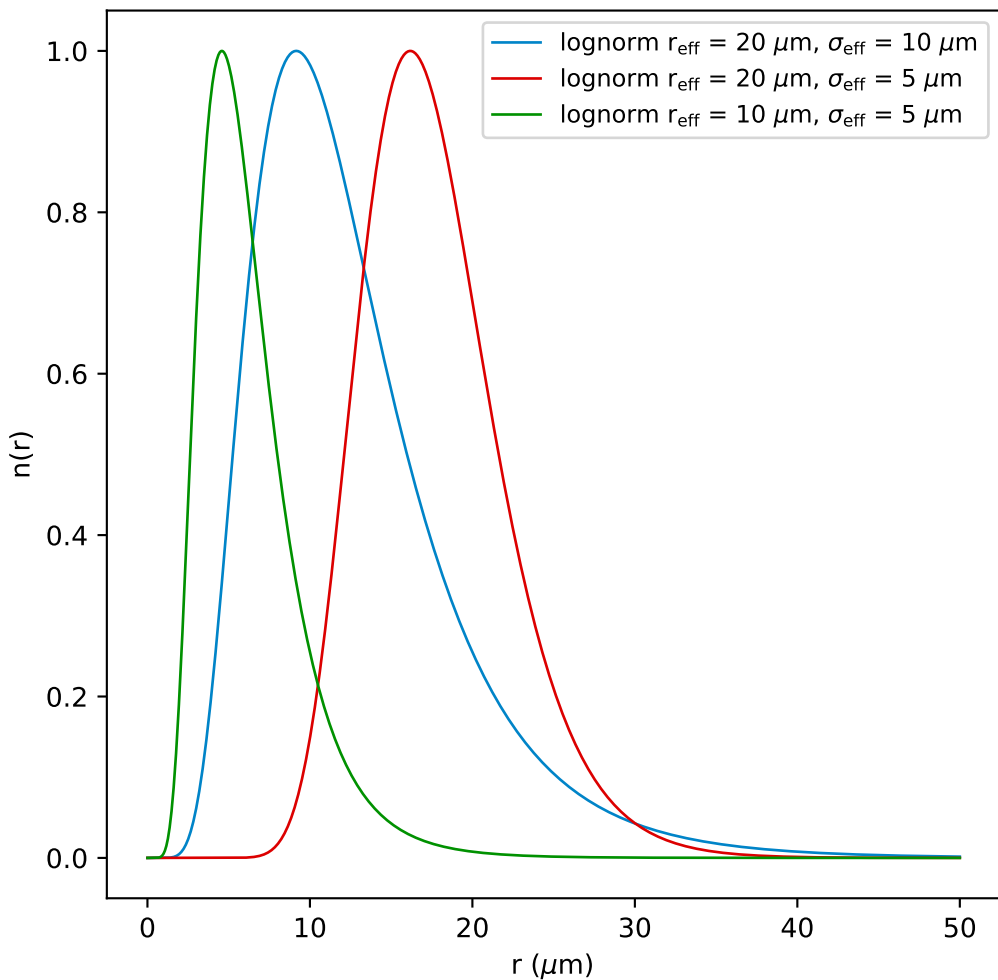

Supplement: Supplementary file 3 [file gmd-14-43-2021-supplement.zip]

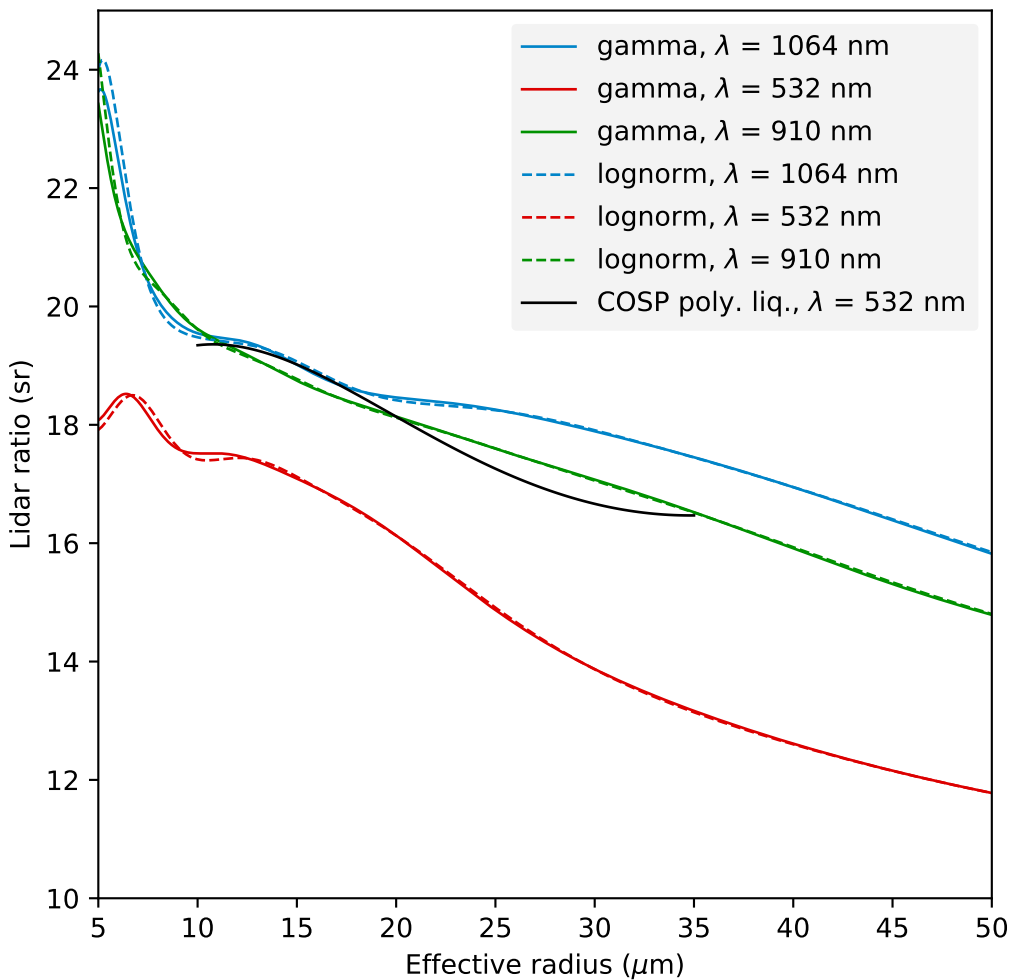

Supplement: Supplementary file 4 [file gmd-14-43-2021-supplement.zip]
